# Supplementary material for: Utilising bio-based plasticiser castor oil and recycled PLA for the production of conductive additive manufacturing feedstock and detection of bisphenol A
Source: Royal Society of Chemistry journal article supplement (doi:10.1039/d3gc01700a), 2023-01-01
Supplement: d3gc01700a1.pdf [file d3gc01700a1.pdf]

## Supporting Information for:

# Utilising bio-based plasticiser castor oil and recycled PLA for the production of conductive additive manufacturing feedstock and detection of bisphenol A

Robert D. Crapnell,<sup>1</sup> Iana V.S. Arantes,<sup>1,2</sup> Matthew J. Whittingham,<sup>1</sup> Evelyn Sigley,<sup>1</sup> Cristiane Kalinke,<sup>1,3</sup> Bruno C. Janegitz,<sup>4</sup> Juliano A. Bonacin,<sup>3</sup> Thiago R.L.C. Paixão,<sup>2</sup> and Craig E. Banks<sup>1\*</sup>

<sup>1</sup>*Faculty of Science and Engineering, Manchester Metropolitan University, Chester Street, M1 5GD, United Kingdom.*

<sup>2</sup>*Departamento de Química Fundamental, Instituto de Química, Universidade de São Paulo, São Paulo, SP, 05508-000, Brazil.*

<sup>3</sup>*Institute of Chemistry, University of Campinas (Unicamp), 13083-859, São Paulo, Brazil.*

<sup>4</sup>*Laboratory of Sensors, Nanomedicine and Nanostructured Materials, Federal University of São Carlos, Araras, 13600-970, Brazil.*

\*To whom correspondence should be addressed.

E-mail: c.banks@mmu.ac.uk; Tel: +44(0)1612471196

**Table S1.** TGA onset temperatures and filler % for all components of recycled filament. The uncertainties in Onset Temperature and Filler Content are the standard deviations of three repeat measurements.

| Material                   | Onset Temperature (°C) | Conductive Filler (wt %) |
|----------------------------|------------------------|--------------------------|
| rPLA                       | 305 ± 5                | -                        |
| Castor Oil                 | 250 ± 3                | -                        |
| CB/CO/rPLA Filament        | 283 ± 3                | 23 ± 4                   |
| Commercial CB/PLA Filament | 304 ± 2                | 21 ± 3                   |

**Table S2** – Analytical parameters obtained from the bespoke filament compared to other electrodes found in the literature to determine bisphenol A.

| Electrode    | Electrode modifier       | Technique | Linear range (µM) | LOD (µM) | Real Sample                         | Reference |
|--------------|--------------------------|-----------|-------------------|----------|-------------------------------------|-----------|
| GCE          | Cu-Zn/GO                 | SWV       | 0.2 – 10          | 0.017    | Plastic drinking cups               | 1         |
| GCE          | NP-PtFe/GR               | DPV       | 0.2 – 96          | 0.17     | Water                               | 2         |
| GCE          | rGO-Ag/PLL               | DPV       | 1 – 80            | 0.54     | Drinking water                      | 3         |
| Graphene/PLA | DMF and echem activation | DPV       | 0.5 – 40          | 0.23     | Water, pea water and food packaging | 4         |
| CB/CO/rPLA   | Aqueous echem activation | DPV       | 0.5 – 10          | 0.1      | Tap and bottled water               | This work |

GCE – glassy carbon electrode; PLA – poly(lactic acid); CB – carbon black; CO – castor oil; GO – graphene oxide; NP-PtFe – nanoporous PtFe alloy; GR – graphene; rGO – reduced graphene oxide; PLL – poly(L-lysine); DMF – dimethyl formamide; echem – electrochemical; SWV – square-wave voltammetry; DPV – differential pulse voltammetry; LOD – limit of detection.

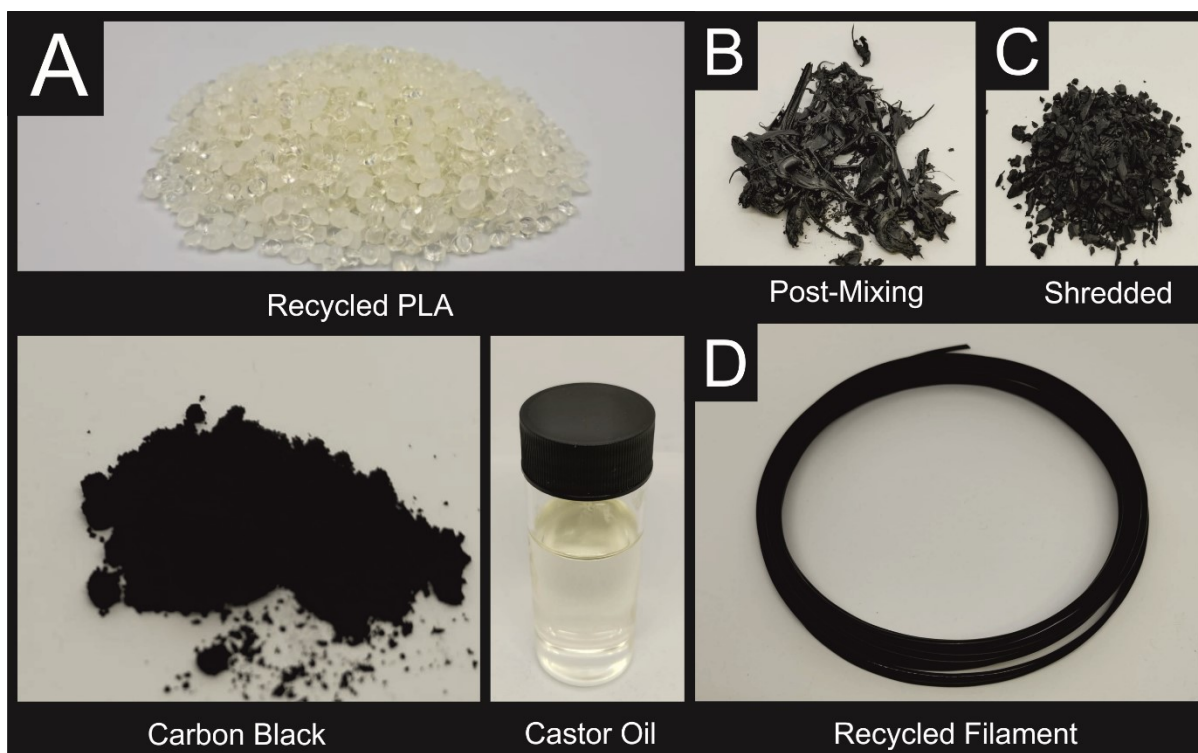

**Figure S1.** (A) Photograph of the raw materials to make the bespoke filament, recycled PLA, carbon black and castor oil. (B) Photograph of the composite after thermal mixing. (C) Photograph of the composite after shredding. (D) Photograph of the extruded filament.

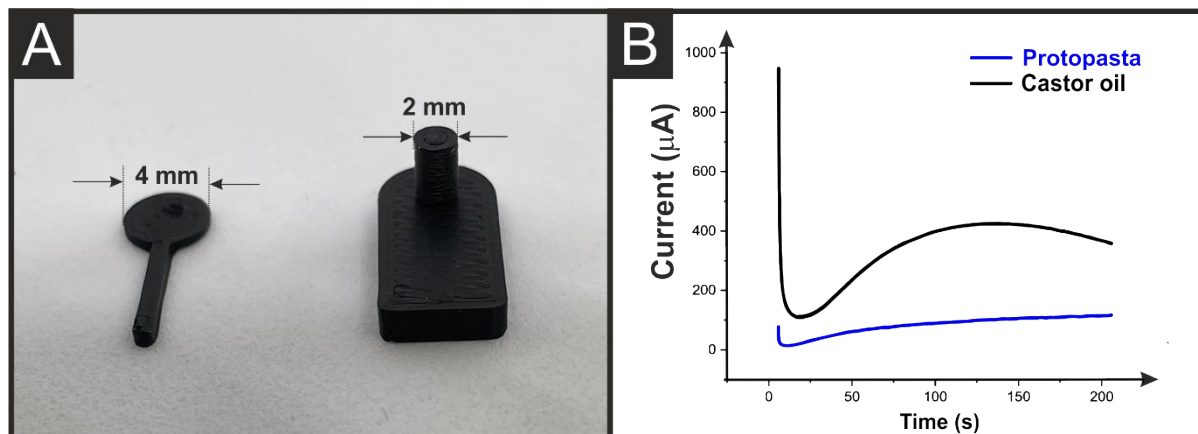

**Figure S2.** (A) Picture of the lollipop and thicker electrodes used in this work and their respective dimensions. (B) Activation electrochemical profile of castor oil/rPLA vs Protopasta in 0.5 M NaOH.

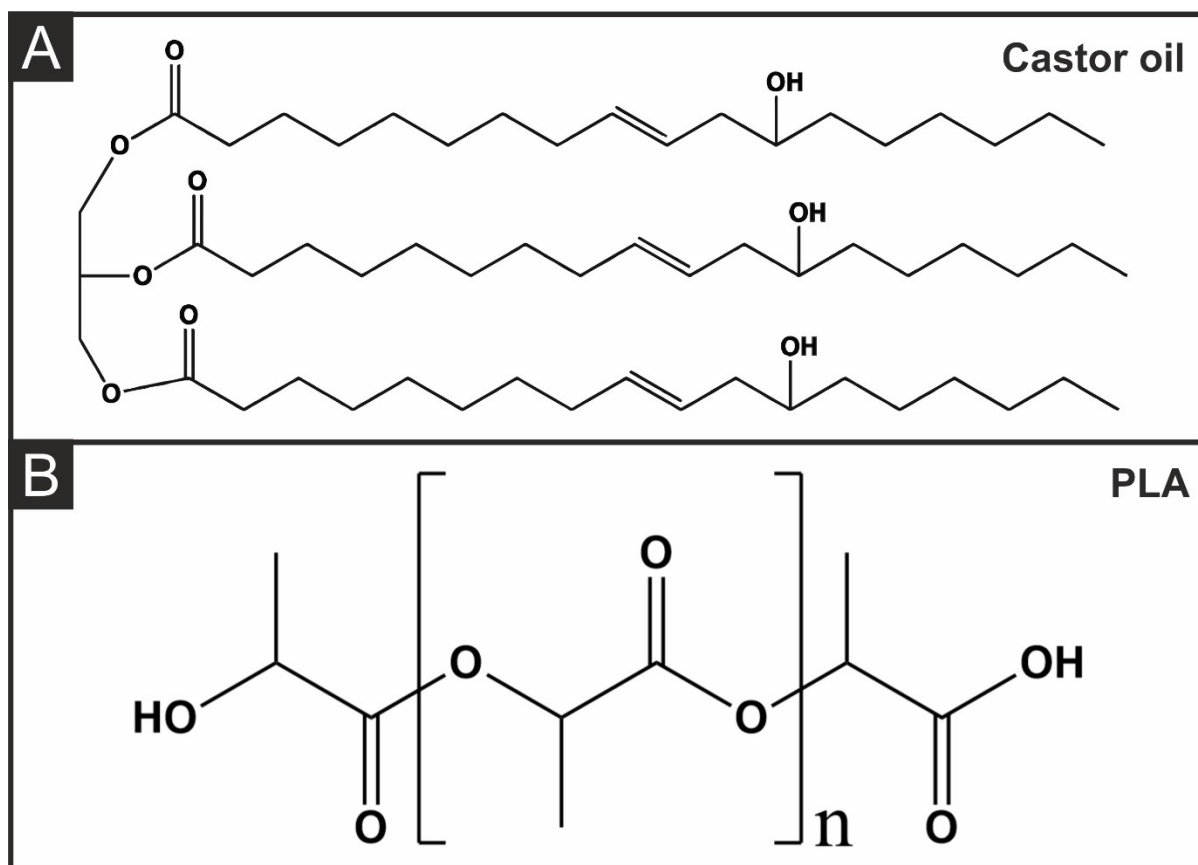

**Figure S3.** (A) Castor oil and (B) PLA structures.

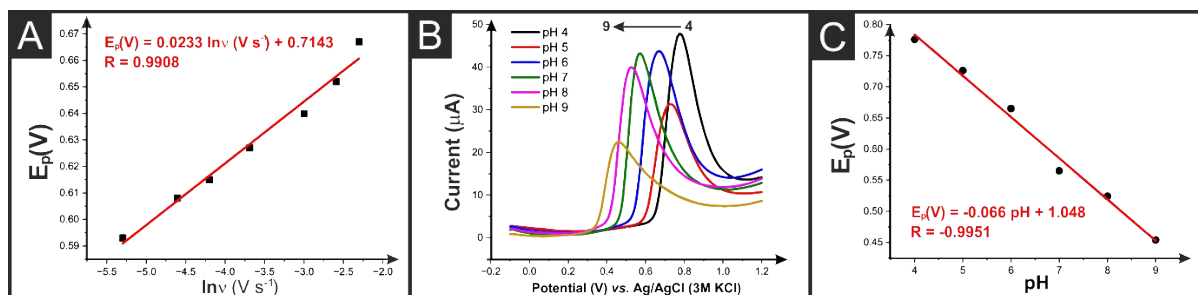

**Figure S4.** (A) Linear correlation of peak potential ( $E_p$ ) with natural logarithm of scan rate ( $\ln v$ ) obtained from  $100 \mu\text{mol L}^{-1}$  BPA CVs in  $0.1 \text{ M}$  PBS pH 7 recorded at different scan rates (5 to  $100 \text{ mV s}^{-1}$ ). (B) DPV results of  $100 \mu\text{M}$  BPA in  $0.1 \text{ M}$  PBS with different pHs (Amplitude:  $50 \text{ mV}$ ; Step potential:  $10 \text{ mV}$ ) and (C) the respective linear correlation between  $E_p$  and pH.

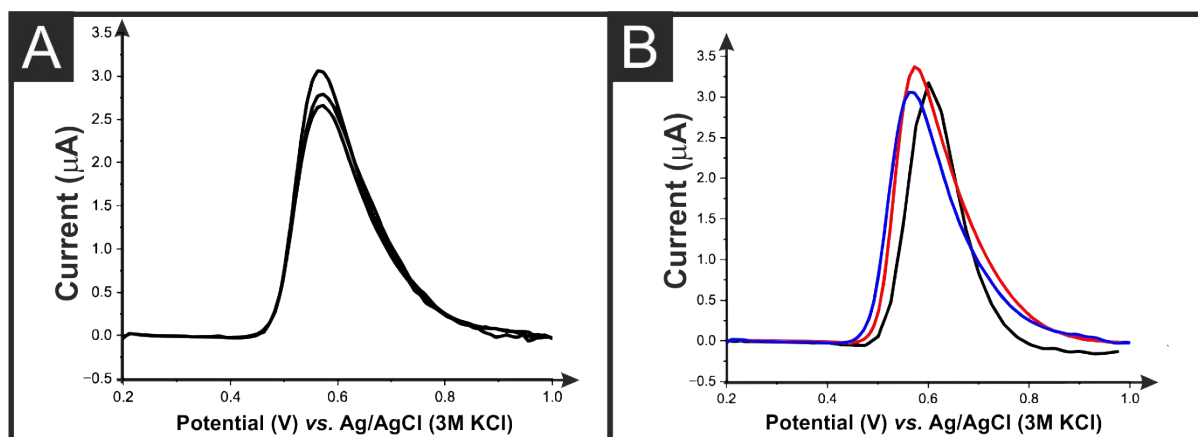

**Figure S5.** (A) Repeatability measurements of 5  $\mu\text{M}$  BPA ( $n=3$ ) performed in the same castor oil/rPLA electrode, by polishing between measurements, and (B) reproducibility using three different electrodes by DPV. Step potential: 10 mV. Amplitude: 50 mV.

#### References:

1. Y. Wang, C. Li, T. Wu and X. Ye, *Carbon*, 2018, **129**, 21-28.
2. C. Tian, D. Chen, N. Lu, Y. Li, R. Cui, Z. Han and G. Zhang, *Journal of Electroanalytical Chemistry*, 2018, **830**, 27-33.
3. Y. Li, H. Wang, B. Yan and H. Zhang, *Journal of Electroanalytical Chemistry*, 2017, **805**, 39-46.
4. C. Kalinke, P. R. de Oliveira, N. V. Neumsteir, B. F. Henriques, G. de Oliveira Aparecido, H. C. Loureiro, B. C. Janegitz and J. A. Bonacin, *Analytica Chimica Acta*, 2022, **1191**, 339228.
